# Supplementary material
Source: publisher figshare collection journal article supplement (https://acs.figshare.com/ndownloader/files/3820513)
Supplement: Supplementary file 1 [file 3820513]

data_1D,

_publ_requested_journal         '??????????????????????????????'
_publ_contact_author_name       '??????????????????????????????'
_publ_contact_author_address    '??????????????????????????????'
_publ_contact_author_email      '??????????????????????????????''
_publ_contact_author_phone      '??????????????????????????????'
_publ_contact_author_fax        '??????????????????????????????'


loop_
_publ_author_name
_publ_author_address
'??????????????????????????????'
;
??????????????????????????????
;


_chemical_name_systematic	'??????????????????????????????'
_chemical_name_common		'??????????????????????????????'
_chemical_formula_structural	'??????????????????????????????'
_chemical_formula_sum		'C16 H14 Co N4 O2 S2 '
_chemical_formula_weight           417.36


_symmetry_cell_setting           triclinic
_symmetry_space_group_name_H-M   'P -1'
_symmetry_Int_Tables_number      2

loop_
_symmetry_equiv_pos_site_id
_symmetry_equiv_pos_as_xyz
1 -x,-y,-z
2 x,y,z

_cell_length_a                   5.62803(64)
_cell_length_b                   8.4717(14)
_cell_length_c                   10.3170(19)
_cell_angle_alpha                76.7846(97)
_cell_angle_beta                 87.540(15)
_cell_angle_gamma                73.483(17)
_cell_volume                     458.988
_cell_formula_units_Z            1
_exptl_crystal_density_diffrn    1.459
loop_
_atom_site_label
_atom_site_type_symbol
_atom_site_symmetry_multiplicity
_atom_site_fract_x
_atom_site_fract_y
_atom_site_fract_z
_atom_site_occupancy
_atom_site_U_iso_or_equiv
_atom_site_thermal_displace_type

C1 C 1 0.561(32) 0.858(38) 0.341(20) 1 0.025(80)   Uiso
C2 C 1 0.503(43) 1.014(33) 0.254(25) 1 0.025(80)   Uiso
C3 C 1 0.303(65) 1.057(23) 0.169(18) 1 0.025(80)   Uiso
C4 C 1 0.164(29) 0.951(39) 0.170(16) 1 0.025(80)   Uiso
C5 C 1 0.222(50) 0.798(28) 0.261(25) 1 0.025(80)   Uiso
C6 C 1 0.245(39) 1.221(17) 0.074(19) 1 0.025(80)   Uiso
C7 C 1 0.365(16) 1.345(12) 0.0850(92) 1 0.048(55)   Uiso
N1 N 1 0.425(41) 0.752(11) 0.345(18) 1 0.025(80)   Uiso
O1 O 1 0.092(14) 1.2496(91) -0.0122(64) 1 0.028(60)   Uiso
Co1 Co 2 0.5 0.5 0.5 1 0.020(60)   Uiso
C8 C 1 0.032(26) 0.588(14) 0.637(12) 1 0.030(70)   Uiso
N2 N 1 -0.197(12) 0.5363(93) 0.6108(86) 1 0.030(70)   Uiso
S1 S 1 0.2351(60) 0.6361(57) 0.6608(36) 1 0.030(70)   Uiso
H1 H 1 0.721699 0.820739 0.40792 1 0.0375   Uiso
H2 H 1 0.613479 1.101 0.252841 1 0.0375   Uiso
H3 H 1 0.00833204 0.98565 0.100036 1 0.0375   Uiso
H4 H 1 0.106467 0.713228 0.266346 1 0.0375   Uiso
H5 H 1 0.564361 1.29407 0.0766471 1 0.072   Uiso
H6 H 1 0.296915 1.45728 0.00561463 1 0.072   Uiso
H7 H 1 0.325286 1.37826 0.181131 1 0.072   Uiso

_diffrn_ambient_temperature            293(2) 
_diffrn_radiation_probe                x-ray
_diffrn_radiation_wavelength           1.540596
_diffrn_measurement_device_type	       'Bruker D8 Advance'
_cell_measurement_temperature          293(2)
_pd_char_colour                        pink 
_pd_proc_ls_prof_R_factor              0.1154  
_pd_proc_ls_prof_wR_factor             0.0740 
_pd_proc_ls_prof_wR_expected           0.1027 
_refine_ls_goodness_of_fit_all		   0.72
_refine_ls_R_I_factor				   0.25

loop_
 _geom_bond_atom_site_label_1
 _geom_bond_atom_site_label_2
 _geom_bond_distance
 _geom_bond_site_symmetry_1
 _geom_bond_site_symmetry_2
 _geom_bond_publ_flag
  Co1 N1  2.30(14)  . . N
  Co1 N2  3.99(7)  . . N
  Co1 S1  2.447(39)  . . N

loop_
_geom_angle_atom_site_label_1
_geom_angle_atom_site_label_2
_geom_angle_atom_site_label_3
_geom_angle
_geom_angle_site_symmetry_1
_geom_angle_site_symmetry_2
_geom_angle_site_symmetry_3
_geom_angle_publ_flag
  S1 Co1 N1 92(4)  . . . N
  N2 Co1 N1 99(6)  . . . N
  Co1 N1 C1 124(15) . . . N


#END
